# Supplementary material for: Direct Evidence for Pitavastatin Induced Chromatin Structure Change in the KLF4 Gene in Endothelial Cells
Source: PLoS One. 2014 May 5;9(5):e96005. doi: 10.1371/journal.pone.0096005 (PMC4010393; doi:10.1371/journal.pone.0096005)
Supplement: File S1 — Supporting Information. Figure S1. Flow chart for microarray analysis. Affymetrix GeneChip Human Genome U133 plus 2.0 arrays were applied for all analysis. The analysis was performed with GeneSpring GX 12.5 following the layout on this flow chart. The details are shown in the Methods section. Insignificant or unannotated probe data was eliminated at each step. The number on the right side shows the number of the remaining probe sets or genes at each step. The 384 selected genes were used for further analyses in Figure 1 and Table S1 in File S1. Figure S2. Gene regulation by pitavastatin in HUVECs and the aortae of Apo-E-deficient mice. (A) HUVECs were treated with 1 µM pitavastatin for the indicated time. (B) ApoE deficient mice were orally administered pitavastatin twice daily at 3 mg/kg/treatment for 12 weeks before sacrifice. Total RNA was isolated and determined by real-time quantitative PCR, as described in Methods. The sequences of applied primers are shown in Table S2B in File S1. Vertical lines indicate the S.D. (n = 3 in A, and n = 12 in B), * P<0.01, ** P<0.001, compared with the control sample, Dunnett's test in A and Student's t test in B. Figure S3. Histological examination of atherosclerotic regions in the aortic sinus. Eight-week-old ApoE deficient mice (n = 12 for each group) were treated twice daily for 12 weeks with vehicle alone (-) or pitavastatin at 3 mg/kg/treatment (+). The heart and aorta were removed rapidly and fixed and embedded in paraffin for Victoria blue-HE staining as described in Methods. Victoria blue-hematoxylin-eosin staining (A) revealed the atherosclerotic lesions (arrow). (B) shows the total plasma cholesterol and triglyceride levels. Note that pitavastatin reduced the plaque area without changing the plasma cholesterol and triglyceride levels. The vertical lines indicate the SEM (n = 12), * P<0.001 compared with the control sample, Student's t test. n.s. indicates not significant. Figure S4. Identification of the MEF2A, MEF2C, [file pone.0096005.s001.pdf]

A

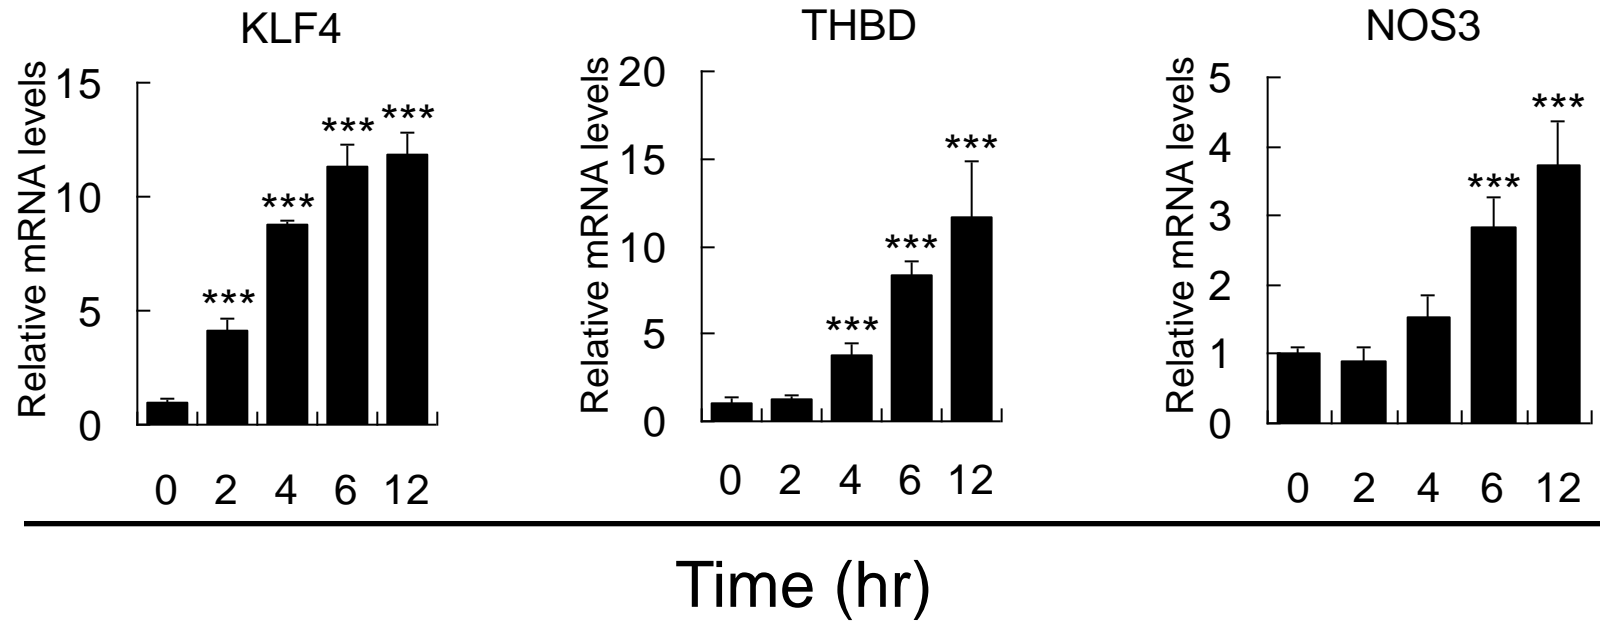

B

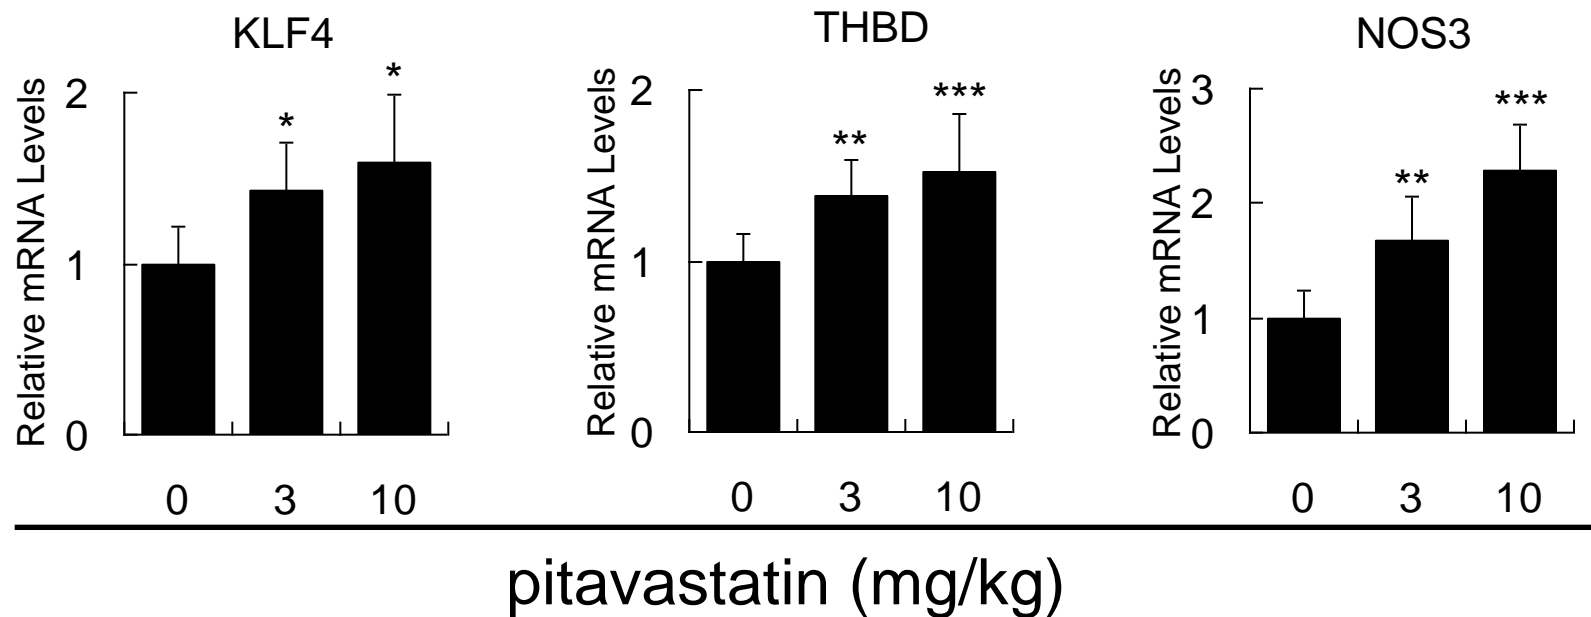

A

$\alpha$ -KLF2  
( N2212 )

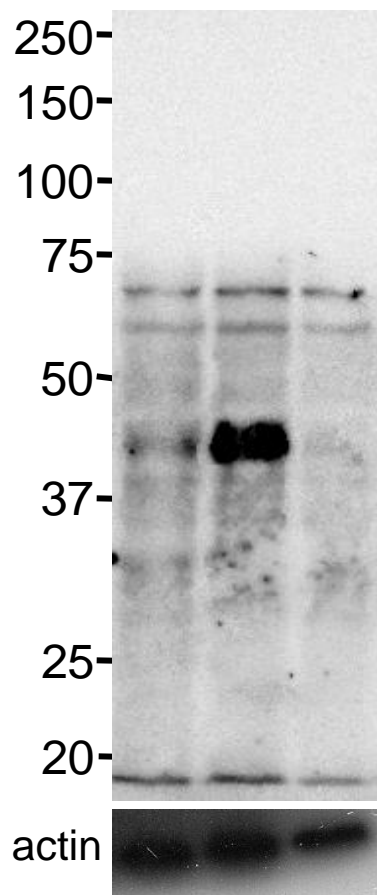

| siRNA        | NS | NS | KLF2 |
|--------------|----|----|------|
| pitavastatin | -  | +  | +    |

B

$\alpha$ -KLF4  
( Y6929 )

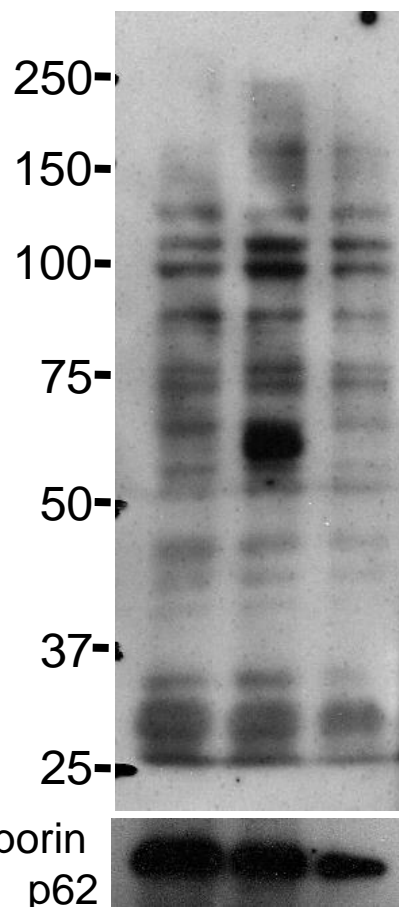

| siRNA        | NS | NS | KLF4 |
|--------------|----|----|------|
| pitavastatin | -  | +  | +    |

C

$\alpha$ -MEF2A ( Y0841 )

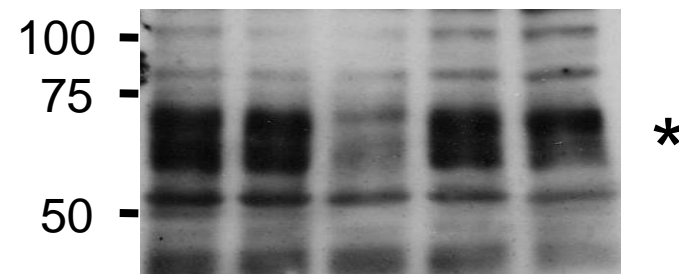

$\beta$  - actin

| siRNA        | NS | NS | MEF 2A | MEF 2C | MEF 2D |
|--------------|----|----|--------|--------|--------|
| pitavastatin | -  | +  | +      | +      | +      |

D

$\alpha$ -MEF2C ( Y1740 )

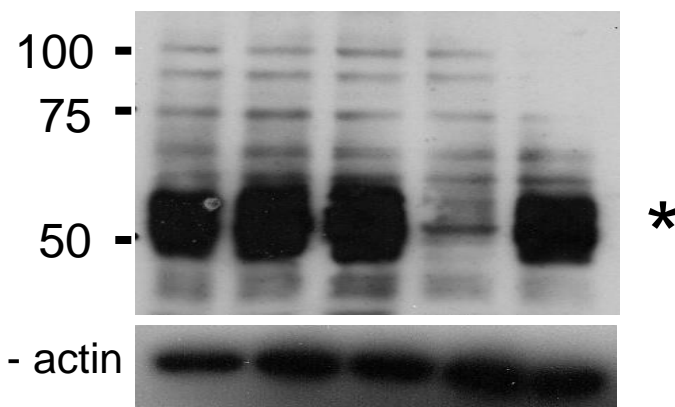

| siRNA        | NS | NS | MEF 2A | MEF 2C | MEF 2D |
|--------------|----|----|--------|--------|--------|
| pitavastatin | -  | +  | +      | +      | +      |

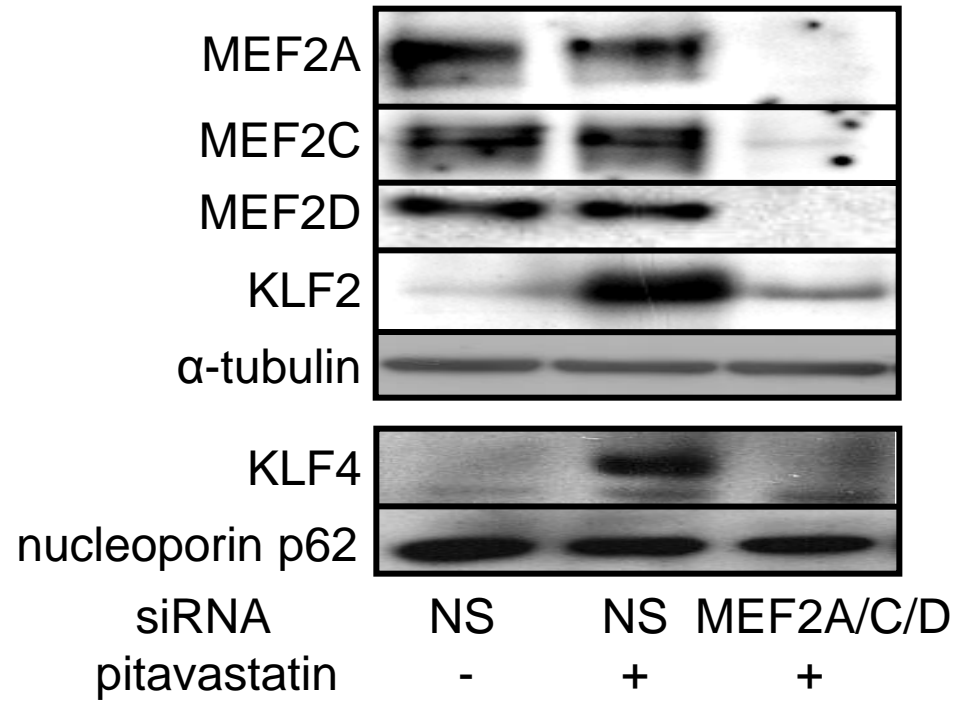

**A** Statin (-) (4878 sites)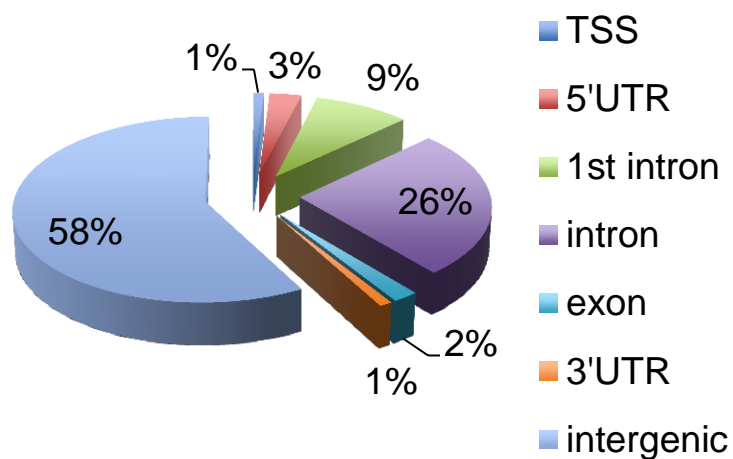**B**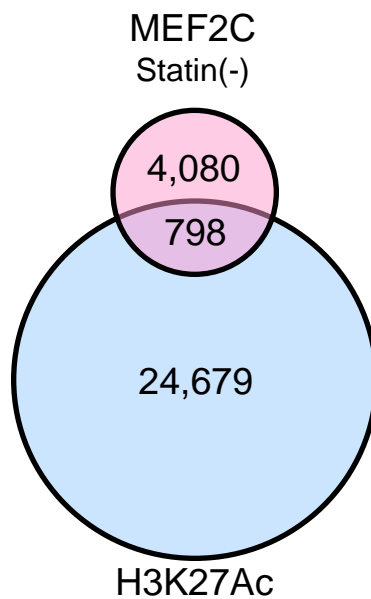**C**

Statin (+) (13030 sites)

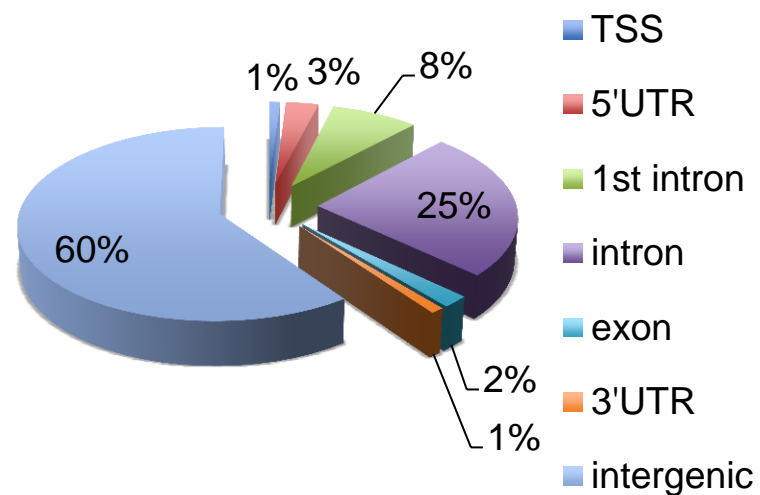

A

| peptide | phosphorylation |                     |
|---------|-----------------|---------------------|
| C       | none            | SYSPTSPSYSPTSPSYSPC |
| Pa      | S5              | SYSPTSPSYSPTSPSYSPC |
| Pb      | S7              | SYSPTSPSYSPTSPSYSPC |
| Pc      | S2              | SYSPTSPSYPTSPSYSPC  |
| Pd      | S5, S7          | SYSPTSPSYSPTSPSYSPC |
| Pe      | S5, S2          | SYSPTSPSYPTSPSYSPC  |
| Pf      | S7, S2          | SYSPTSPSYPTSPSYSPC  |
| Pg      | S7, S5          | SYSPTSPSYSPTSPSYSPC |
| Ph      | S2, S5          | SYSPTSPSYPTSPSYSPC  |
| Pi      | S2, S7          | SYSPTSPSYPTSPSYSPC  |

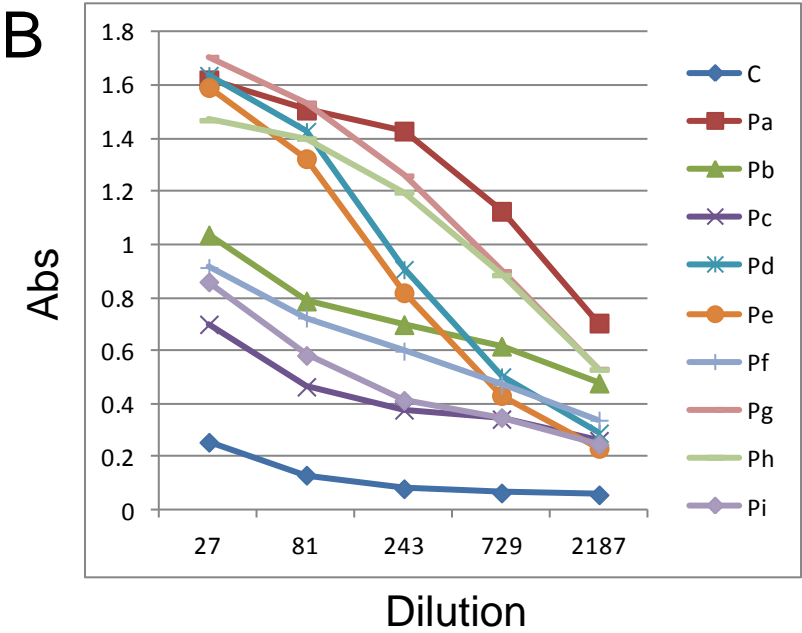

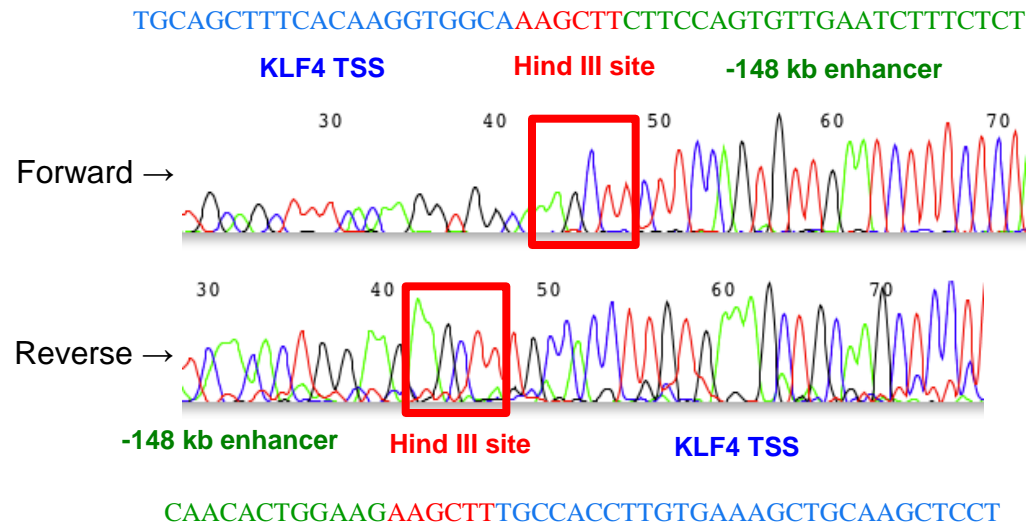

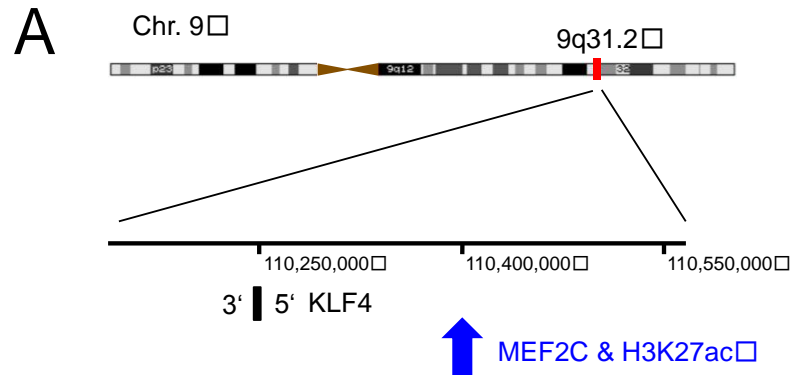

Probe K  
(RP11-80F13)

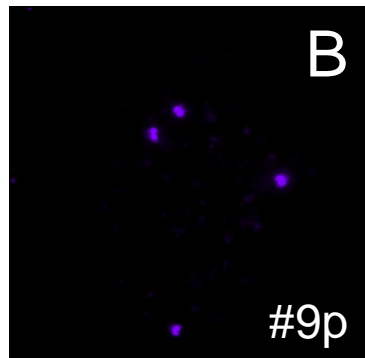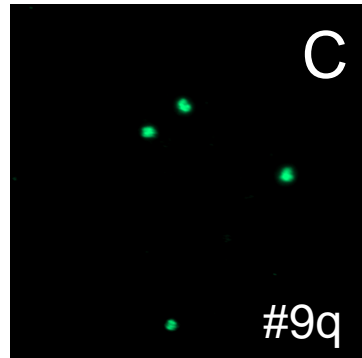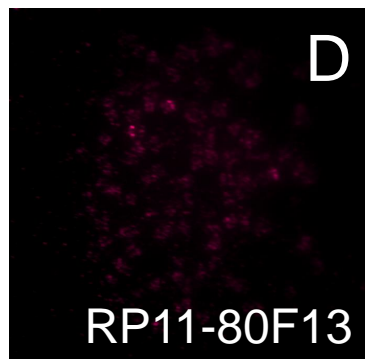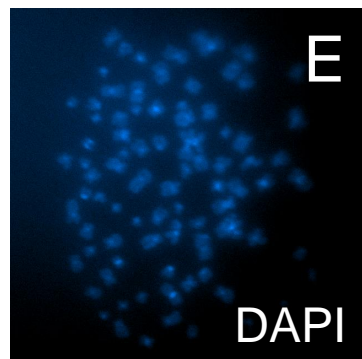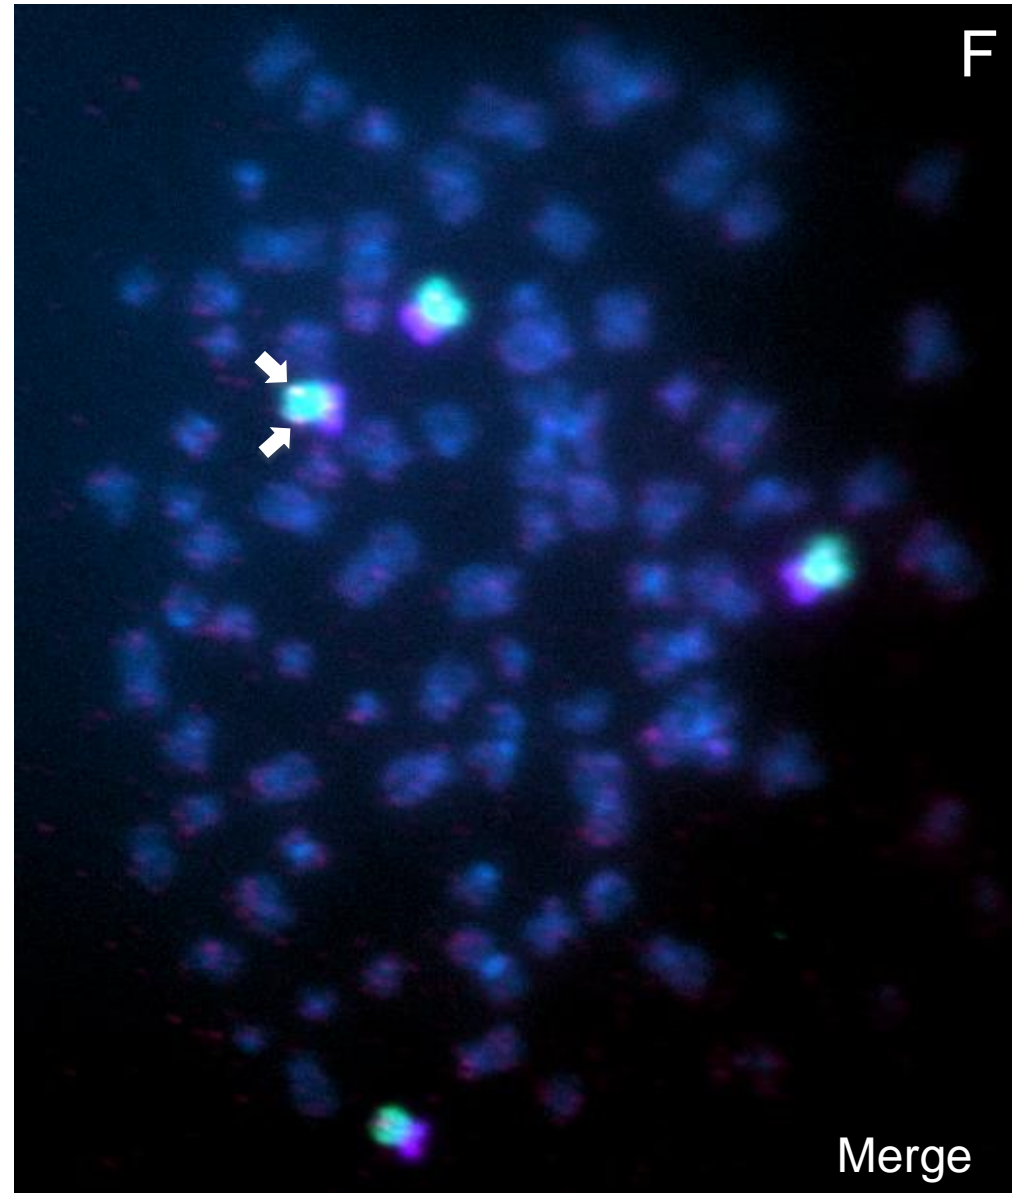

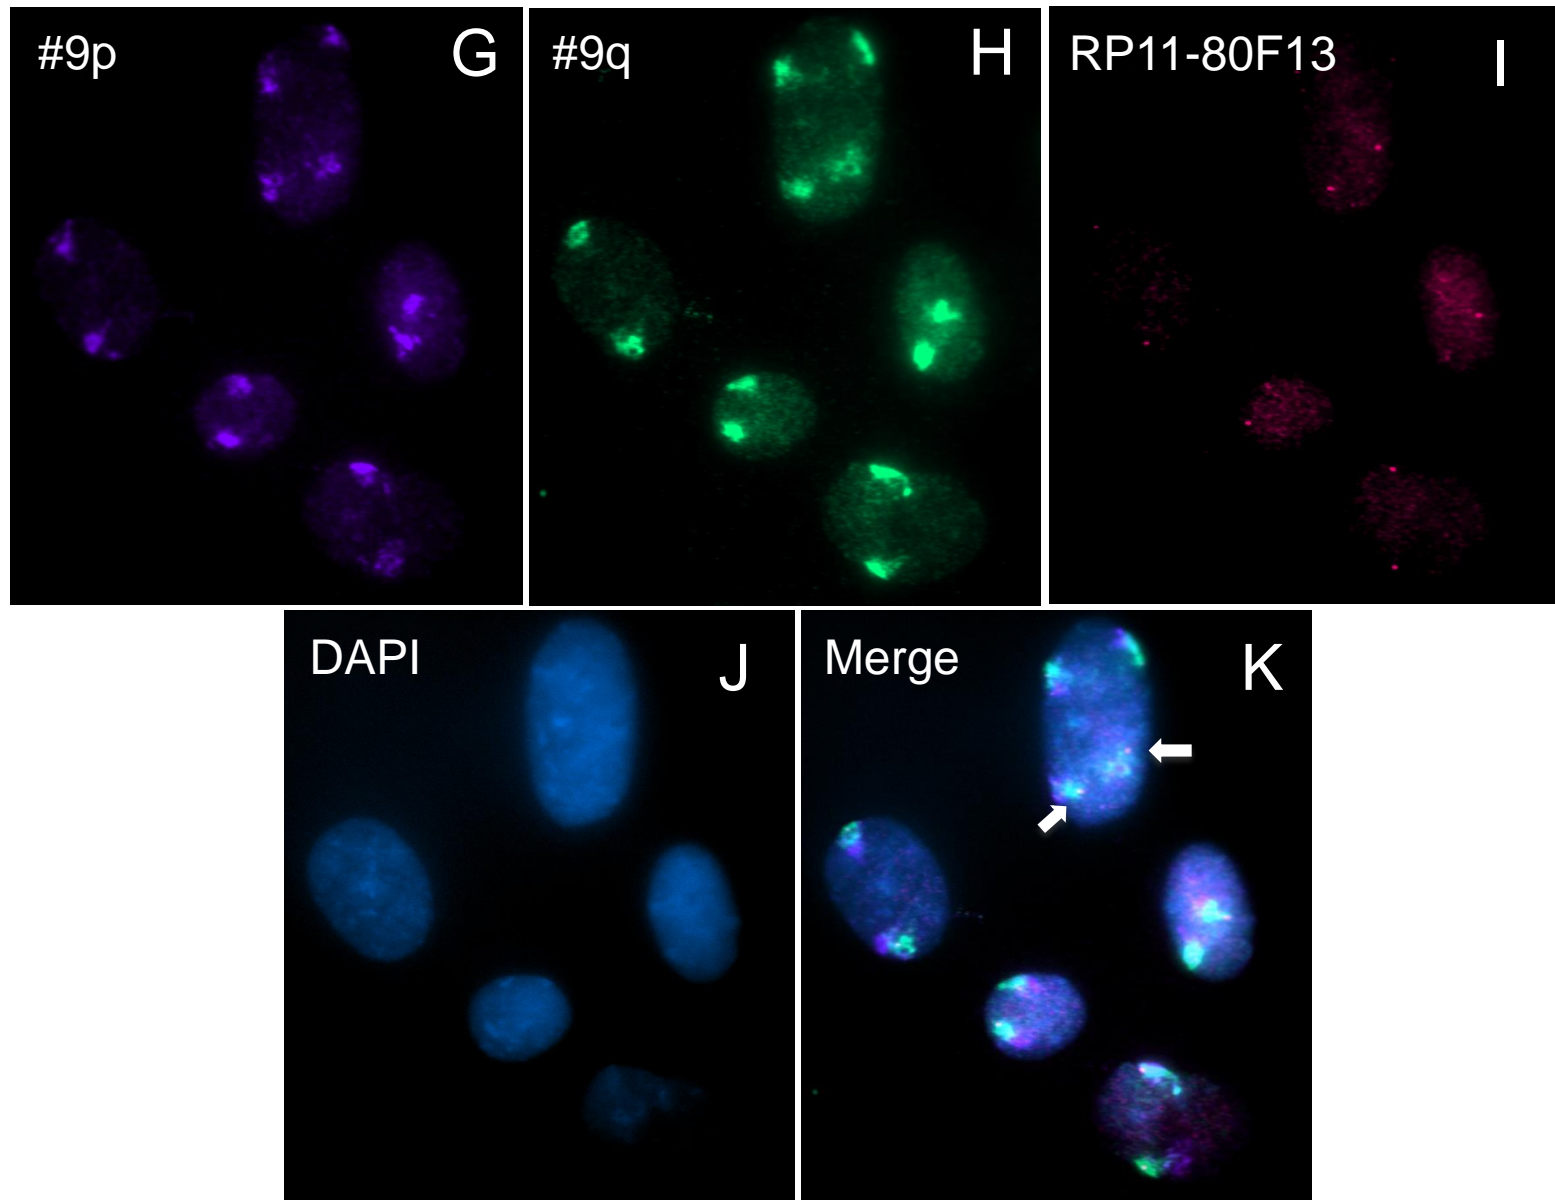

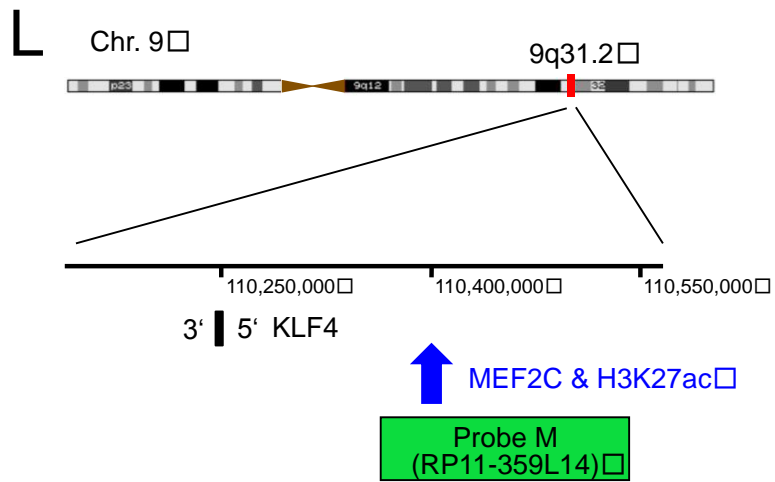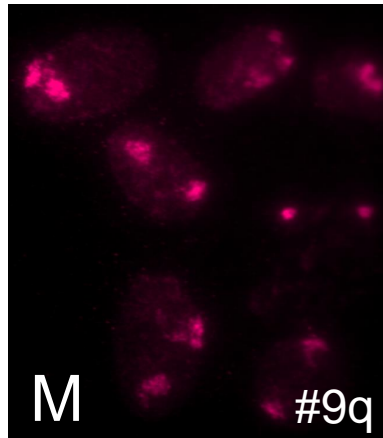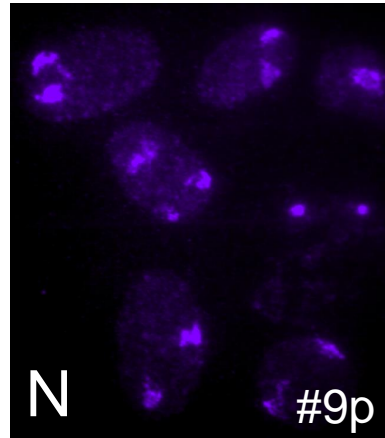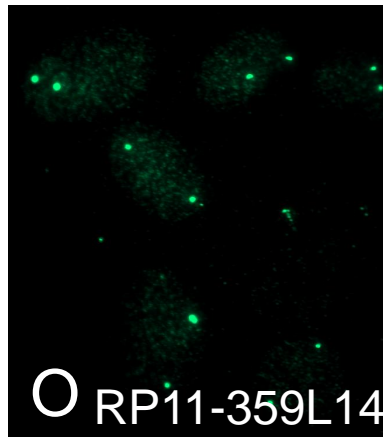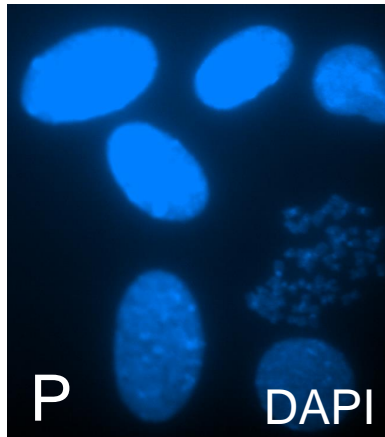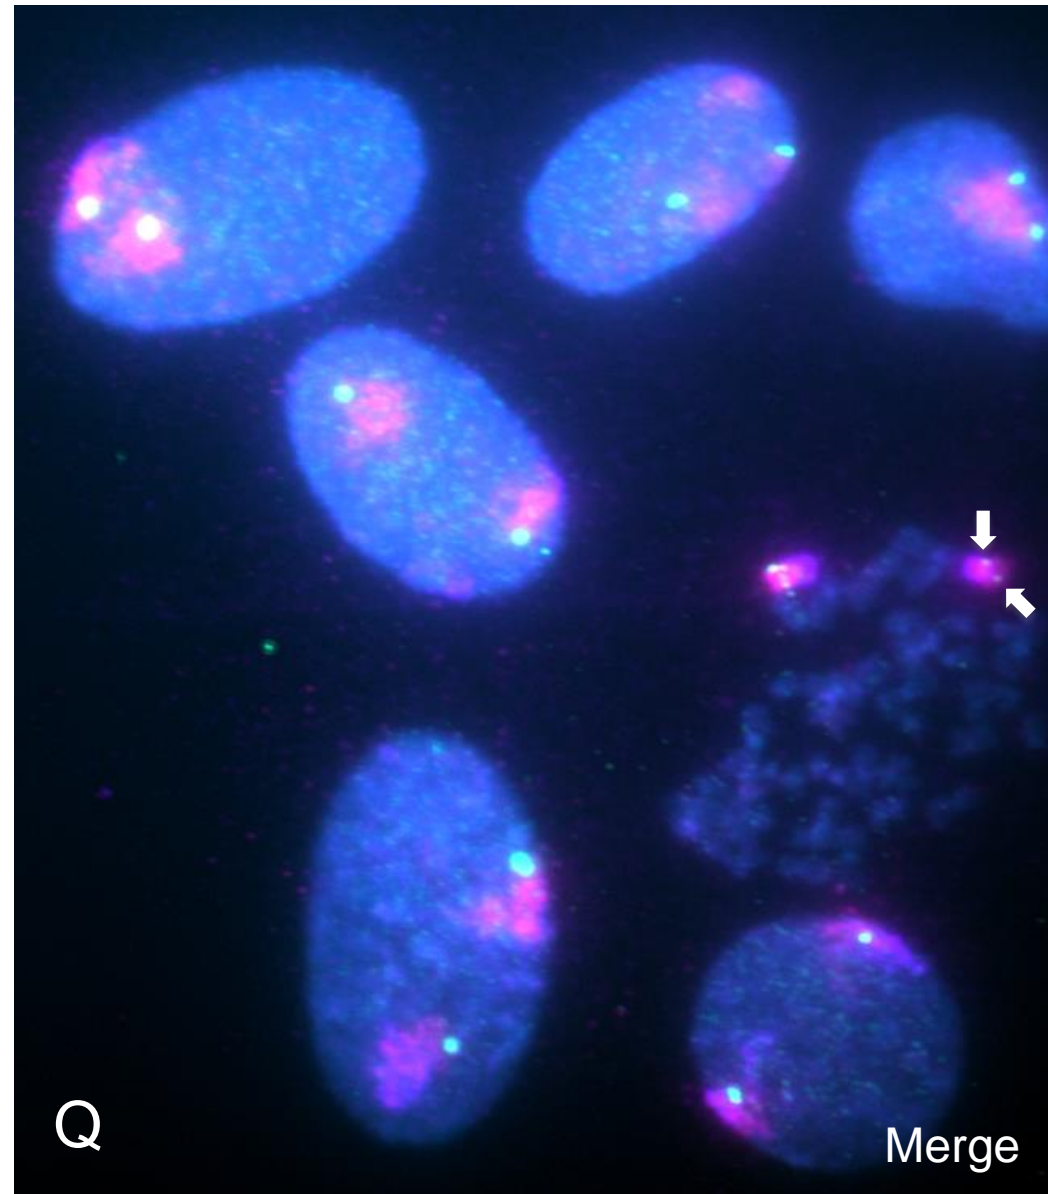

**Table S1. List of genes induced by pitavastatin (top 20 genes)**

| Probe ID                                                                                            | Entrez Gene | Gene Symbol  | Microarray analysis<br>(Fold change<br>compared to DMSO) |
|-----------------------------------------------------------------------------------------------------|-------------|--------------|----------------------------------------------------------|
| 220266_s_at, 221841_s_at                                                                            | 9314        | KLF4         | 13.03                                                    |
| 219371_s_at, 226645_at,<br>226646_at                                                                | 10365       | KLF2         | 3.95                                                     |
| 222162_s_at, 222486_s_at                                                                            | 9510        | ADAMTS1      | 3.86                                                     |
| 203887_s_at, 203888_at,<br>237252_at                                                                | 7056        | THBD         | 3.72                                                     |
| 205749_at                                                                                           | 1543        | CYP1A1       | 3.09                                                     |
| 230746_s_at                                                                                         | 100288985   | LOC100288985 | 2.58                                                     |
| 208937_s_at                                                                                         | 3397        | ID1          | 2.34                                                     |
| 203665_at                                                                                           | 3162        | HMOX1        | 2.31                                                     |
| 206049_at                                                                                           | 6403        | SELP         | 2.24                                                     |
| 229873_at                                                                                           | 283219      | KCTD21       | 2.21                                                     |
| 207001_x_at, 208763_s_at,<br>235364_at                                                              | 1831        | TSC22D3      | 2.19                                                     |
| 204284_at, 240187_at                                                                                | 5507        | PPP1R3C      | 2.16                                                     |
| 202393_s_at                                                                                         | 7071        | KLF10        | 2.12                                                     |
| 214218_s_at, 221728_x_at,<br>224588_at, 224589_at,<br>224590_at, 227671_at,<br>235446_at, 243712_at | 7503        | XIST         | 2.11                                                     |
| 215506_s_at                                                                                         | 9077        | DIRAS3       | 2.08                                                     |
| 221087_s_at                                                                                         | 80833       | APOL3        | 2.00                                                     |
| 206320_s_at, 227719_at                                                                              | 4093        | SMAD9        | 1.99                                                     |
| 225954_s_at, 231072_at                                                                              | 90007       | MIDN         | 1.98                                                     |
| 205581_s_at                                                                                         | 4846        | NOS3         | 1.98                                                     |
| 229172_at, 234610_at                                                                                | 116835      | HSPA12B      | 1.96                                                     |

**Table S2A. si RNA**

|       |                           |
|-------|---------------------------|
| MEF2A | AAUAAUCAGUGUUGUAGGCAGUCGG |
| MEF2C | UAAACCCAGACAGAGAUGACAGGUC |
| MEF2D | ACUAAAGGCUGGUAAGGAGGAGAGC |
| KLF4  | AUUGGAGAGAAUAAAGUCCAGGUCC |

**Table S2B. Primer pairs for real Time PCR**

|                |    |                          |
|----------------|----|--------------------------|
| Cyclophilin    | Fw | TTCGTGCTCTGAGCACTGGAGA   |
|                | Rv | GGACCCGTATGCTTTAGGATGAAG |
| KLF4           | Fw | GACGGCTGTGGATGGAAATTC    |
|                | Rv | CGGTGCCCCGTGTGTTTAC      |
| NOS3           | Fw | CCCTTCAGTGGCTGGTACAT     |
|                | Rv | TATCCAGGTCCATGCAGACA     |
| Thrombomodulin | Fw | TTGCGAGAAGAGACAAACACCTC  |
|                | Rv | CAAGCTCCCAATTCCACAAGAC   |

**Table S2C. Primer pairs for ChIP-PCR**

|                |    |                       |
|----------------|----|-----------------------|
| KLF4 (-98 kb)  | Fw | TTACCCAGCAAATCGGGAAGG |
|                | Rv | AGCCGGGCTTCTGTGTGTAT  |
| KLF4 (-148 kb) | Fw | GCTGCCTGACGTAGGGAGATA |
|                | Rv | GGCCTCGGGAAGTACCA     |
| KLF4 (-147 kb) | Fw | CAGGCAGTGCTAGGGCGTA   |
|                | Rv | GGGAATCTGGGAGGCTCAG   |

**Table S2D. Primer pairs for reporter assay**

|                         |    |                           |
|-------------------------|----|---------------------------|
| For cloning gene        |    |                           |
| KLF4 promoter           | Fw | CAGGAGGCGGAGGTTGCACTGAG   |
|                         | Rv | TAATGTGGGGGCCCAGAA        |
| KLF4 enhancer (-98 kb)  | Fw | TACCCAGCAAATCGGGAAGGAACTG |
|                         | Rv | GTTCTTTGGCGAACAACCTGCTCCG |
| KLF4 enhancer (-148 kb) | Fw | TGCGCTTCCCTCCGACGCGCGGAG  |
|                         | Rv | TGCCTCGGGCCGGTCTTGCTCGG   |

**Table S2E. Primers and TaqMan probes for 3C assay**

|                   |                                 |
|-------------------|---------------------------------|
| KLF4 Fw           | ACCCGAATTGCTTTGAAATGAA          |
| KLF4 TaqMan probe | (6-FAM)TCCCTGCTAATAAATAAC(MGB)  |
| KLF4 (-1kb) Rv    | TCCAACCTGGGCAATAGAATG           |
| KLF4 (-45 kb) Rv  | TCTGTGACTCCAGCACCCAAG           |
| KLF4 (-98 kb) Rv  | TGCAACCCTGGCCAAGA               |
| KLF4 (-120 kb) Rv | TTGTACTGGTTCATCACGGATTG         |
| KLF4 (-148 kb) Rv | TGCGCACATACACACCATACTC          |
| KLF4 (-180 kb) Rv | AGAAATACATCTCTCCTCAGACTAACTCTGA |
